# Supplementary material for: A first step towards quantum energy potentials of electron pairs
Source: Royal Society of Chemistry journal article supplement (doi:10.1039/c8cp07509c), 2019-01-01
Supplement: c8cp07509c1.pdf [file c8cp07509c1.pdf]

## Supporting Information for

# *“A first step towards Quantum Energy Potentials of Electron Pairs”*

**Julen Munárriz,<sup>1,2,\*</sup> Rubén Laplaza,<sup>1,2</sup> Ángel Martín Pendás,<sup>3</sup> Julia Contreras-García<sup>2,\*</sup>**

<sup>1</sup>Departamento de Química Física and Instituto de Biocomputación y Física de  
Sistemas Complejos (BIFI), Universidad de Zaragoza, Zaragoza 50009

<sup>2</sup>Sorbonne Université, CNRS, Laboratoire de Chimie Théorique, LCT, F. 75005 Paris,  
France

<sup>3</sup>Laboratorio de Química Física y Analítica, Universidad de Oviedo, 33006, Oviedo,  
Spain

## Table of Contents

|                                                                                                                      |    |
|----------------------------------------------------------------------------------------------------------------------|----|
| CH <sub>3</sub> -X ELF Basins .....                                                                                  | 2  |
| ELF at equilibrium.....                                                                                              | 2  |
| Evolution of populations and volumes.....                                                                            | 3  |
| CH <sub>3</sub> -X $R_B$ and $R_{LP}$ as a function of $R$ .....                                                     | 4  |
| Computational details .....                                                                                          | 5  |
| Stability check .....                                                                                                | 5  |
| Integration errors.....                                                                                              | 17 |
| Evolution of the energetic terms and linear fittings .....                                                           | 19 |
| Electrostatic interaction energy .....                                                                               | 19 |
| Kinetic energy.....                                                                                                  | 22 |
| Exchange-correlation .....                                                                                           | 24 |
| Core Energies .....                                                                                                  | 25 |
| BH <sub>3</sub> -NH <sub>3</sub> , BeH <sub>2</sub> -NH <sub>3</sub> , CH <sub>3</sub> -Li and Li <sub>2</sub> ..... | 26 |

**CH<sub>3</sub>-X ELF Basins****ELF at equilibrium**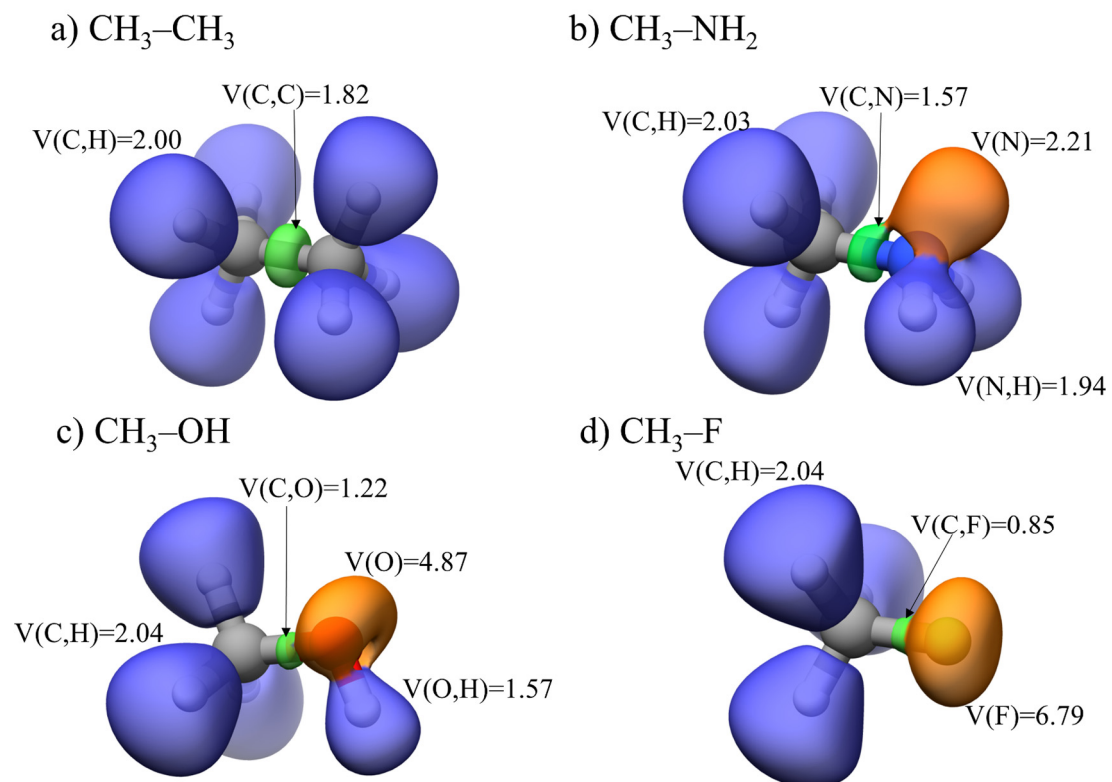

**Figure S1.** ELF basins (isovalue = 0.8) and populations for equilibrium geometries of a) CH<sub>3</sub>-CH<sub>3</sub>, b) CH<sub>3</sub>-NH<sub>2</sub>, c) CH<sub>3</sub>-OH and d) CH<sub>3</sub>-F. V(C,H) basins are shown in blue, V(C,X) in green, and V(N) in orange.

## Evolution of populations and volumes

a) CH<sub>3</sub>-CH<sub>3</sub>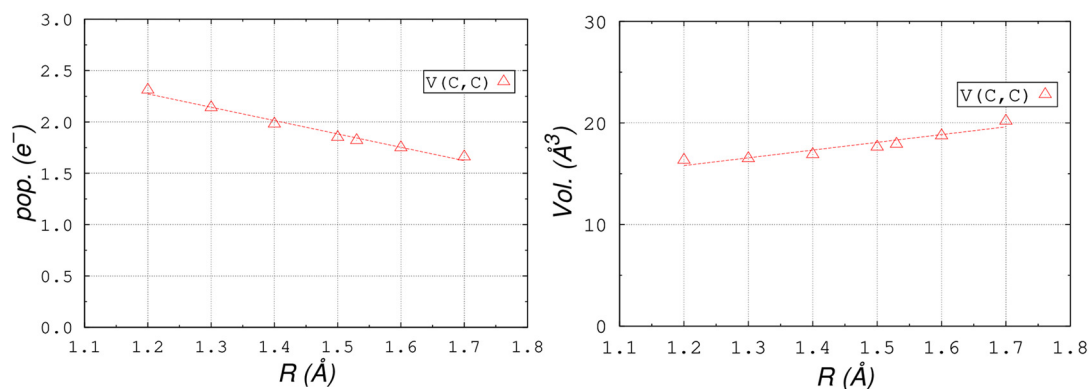b) CH<sub>3</sub>-OH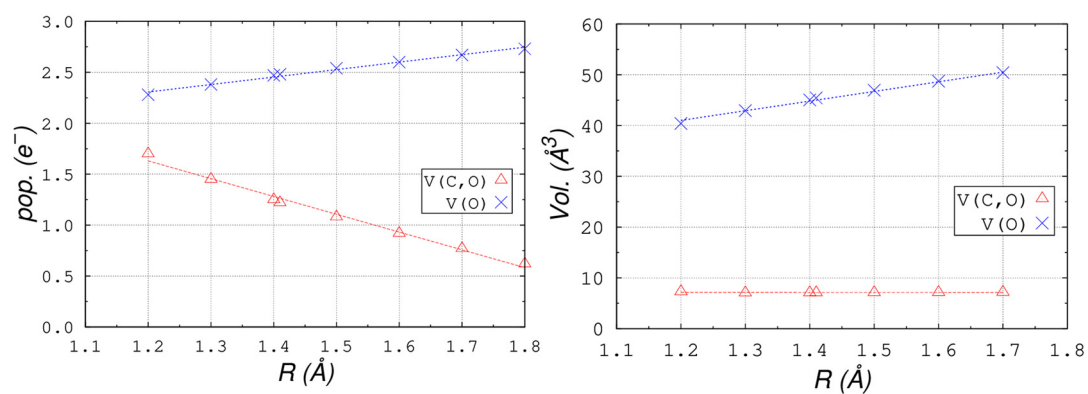c) CH<sub>3</sub>-F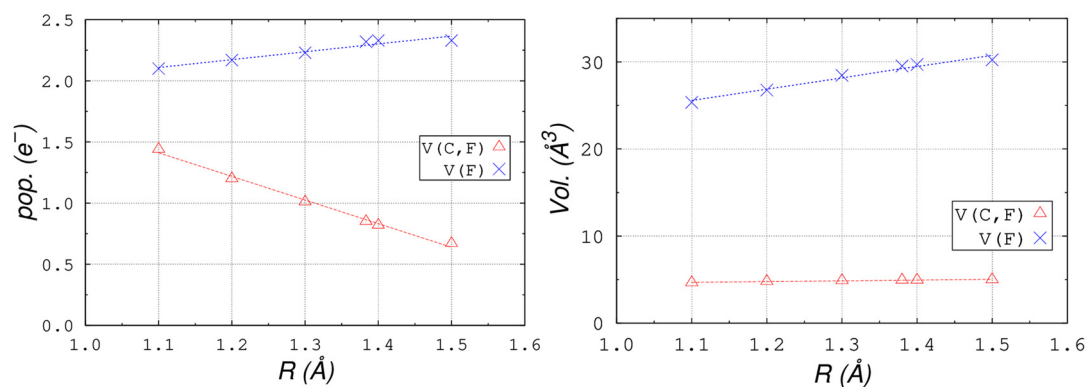

**Figure S2.**  $V(C,X)$  and  $V(X)$  populations and volumes for: a) CH<sub>3</sub>-CH<sub>3</sub>, b) CH<sub>3</sub>-OH, and c) CH<sub>3</sub>-F. Linear regression coefficients for populations: a) CH<sub>3</sub>-CH<sub>3</sub>,  $R^2 = 0.984$  for  $V(C,C)$ ; b) CH<sub>3</sub>-OH,  $R^2 = 0.989$  for  $V(C,O)$  and  $0.988$  for  $V(O)$ ; c) CH<sub>3</sub>-F,  $R^2 = 0.993$  for  $V(C,F)$  and  $0.934$  for  $V(F)$ . Linear regression coefficients for volumes: a) CH<sub>3</sub>-CH<sub>3</sub>,  $R^2 = 0.908$  for  $V(C,C)$ ; b) CH<sub>3</sub>-OH,  $R^2 = 0.993$  for  $V(C,O)$  and  $0.992$  for  $V(O)$ ; c) CH<sub>3</sub>-F,  $R^2 = 0.955$  for  $V(C,F)$  and  $0.969$  for  $V(F)$ .

### CH<sub>3</sub>-X $R_B$ and $R_{LP}$ as a function of $R$

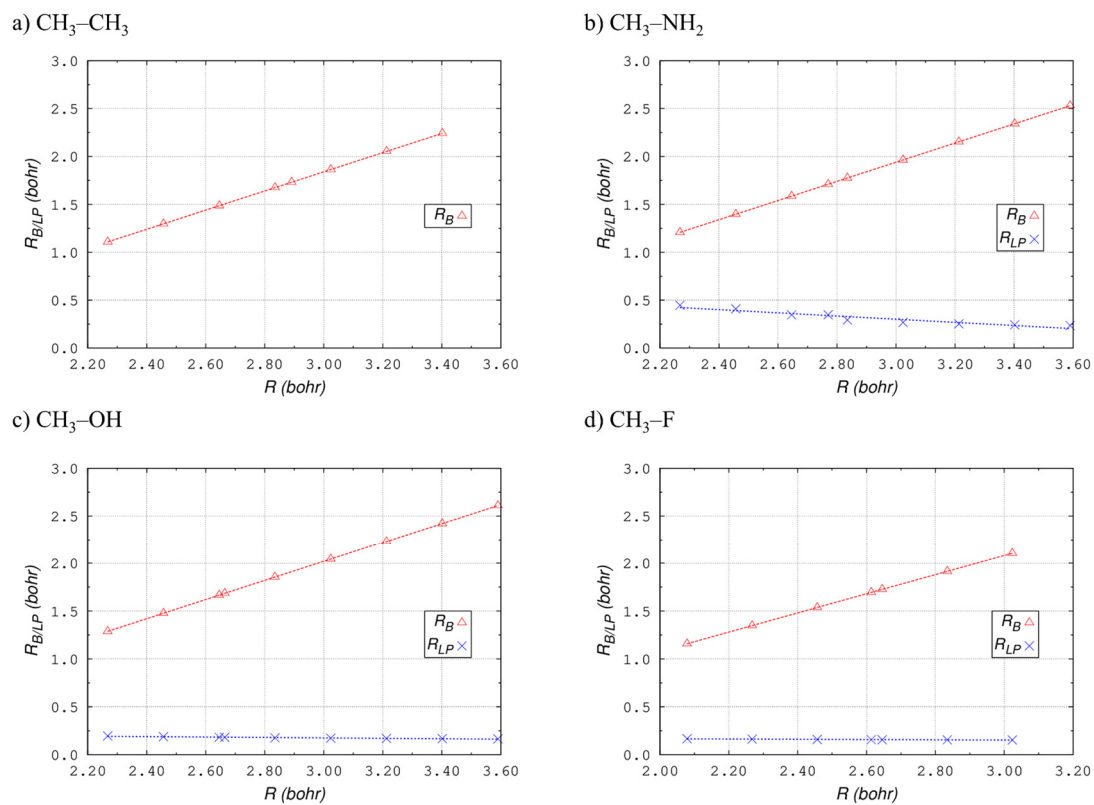

**Figure S3.** Bond and Lone Pair basin length as a function of the interatomic C-X distance for a) CH<sub>3</sub>-CH<sub>3</sub>, b) CH<sub>3</sub>-NH<sub>2</sub>, c) CH<sub>3</sub>-OH, and d) CH<sub>3</sub>-F. Linear regression coefficients for lone pairs:  $R^2 = 0.900$  for CH<sub>3</sub>-NH<sub>2</sub>;  $0.940$  for CH<sub>3</sub>-OH; and  $0.961$  for CH<sub>3</sub>-F.

**Computational details****Stability check**Kinetic energy C-N**Table S1.** Kinetic energy (in a.u.) for CH<sub>3</sub>-NH<sub>2</sub>, as a function of the method.

| R (Å) | 1/R <sup>2</sup><br>(bohr <sup>-2</sup> ) | HF                |                      |         |         |
|-------|-------------------------------------------|-------------------|----------------------|---------|---------|
|       |                                           | 6-31G( <i>d</i> ) | 6-311G( <i>d,p</i> ) | cc-PVDZ | cc-PVTZ |
| 1.30  | 0.166                                     | 3.068             | 3.065                | 3.044   | 3.072   |
| 1.40  | 0.143                                     | 2.515             | 2.514                | 2.526   | 2.513   |
| 1.50  | 0.124                                     | 2.125             | 2.123                | 2.129   | 2.119   |
| 1.60  | 0.109                                     | 1.811             | 1.812                | 1.820   | 1.812   |
| 1.70  | 0.097                                     | 1.556             | 1.557                | 1.567   | 1.549   |
| 1.80  | 0.086                                     | 1.324             | 1.322                | 1.343   | 1.319   |
| 1.90  | 0.078                                     | 1.112             | 1.111                | 1.113   | 1.100   |
| R (Å) | 1/R <sup>2</sup><br>(bohr <sup>-2</sup> ) | PBE               |                      |         |         |
|       |                                           | 6-31G( <i>d</i> ) | 6-311G( <i>d,p</i> ) | cc-PVDZ | cc-PVTZ |
| 1.30  | 0.166                                     | 3.110             | 3.125                | 3.105   | 3.133   |
| 1.40  | 0.143                                     | 2.555             | 2.549                | 2.556   | 2.549   |
| 1.50  | 0.124                                     | 2.147             | 2.143                | 2.159   | 2.141   |
| 1.60  | 0.109                                     | 1.844             | 1.842                | 1.847   | 1.839   |
| 1.70  | 0.097                                     | 1.572             | 1.575                | 1.572   | 1.579   |
| 1.80  | 0.086                                     | 1.336             | 1.334                | 1.344   | 1.328   |
| 1.90  | 0.078                                     | 1.087             | 1.092                | 1.101   | 1.082   |
| R (Å) | 1/R <sup>2</sup><br>(bohr <sup>-2</sup> ) | PBEO              |                      |         |         |
|       |                                           | 6-31G( <i>d</i> ) | 6-311G( <i>d,p</i> ) | cc-PVDZ | cc-PVTZ |
| 1.30  | 0.166                                     | 3.086             | 3.107                | 3.087   | 3.124   |
| 1.40  | 0.143                                     | 2.535             | 2.535                | 2.541   | 2.534   |
| 1.50  | 0.124                                     | 2.136             | 2.135                | 2.139   | 2.133   |
| 1.60  | 0.109                                     | 1.827             | 1.825                | 1.837   | 1.821   |
| 1.70  | 0.097                                     | 1.569             | 1.568                | 1.569   | 1.562   |
| 1.80  | 0.086                                     | 1.323             | 1.329                | 1.328   | 1.329   |
| 1.90  | 0.078                                     | 1.090             | 1.091                | 1.093   | 1.088   |
| R (Å) | 1/R <sup>2</sup><br>(bohr <sup>-2</sup> ) | B3LYP             |                      |         |         |
|       |                                           | 6-31G( <i>d</i> ) | 6-311G( <i>d,p</i> ) | cc-PVDZ | cc-PVTZ |
| 1.30  | 0.166                                     | 3.089             | 3.127                | 3.108   | 3.129   |
| 1.40  | 0.143                                     | 2.540             | 2.540                | 2.548   | 2.538   |
| 1.50  | 0.124                                     | 2.138             | 2.137                | 2.148   | 2.137   |
| 1.60  | 0.109                                     | 1.830             | 1.828                | 1.845   | 1.823   |
| 1.70  | 0.097                                     | 1.570             | 1.566                | 1.576   | 1.565   |
| 1.80  | 0.086                                     | 1.342             | 1.330                | 1.341   | 1.333   |
| 1.90  | 0.078                                     | 1.091             | 1.097                | 1.101   | 1.098   |

The linear regression fittings for C-N bond kinetic energy are the following:

HF:

$$6-31G(d): \quad y = 21.816 \cdot x - 0.573; R^2 = 0.999$$

$$6-311G(d,p): \quad y = 21.801 \cdot x - 0.573; R^2 = 0.999$$

$$cc-PVDZ: \quad y = 21.542 \cdot x - 0.538; R^2 = 0.999$$

$$cc-PVTZ: \quad y = 21.956 \cdot x - 0.593; R^2 = 0.999$$

PBE:

$$6-31G(d): \quad y = 22.422 \cdot x - 0.623; R^2 = 0.999$$

$$6-311G(d,p): \quad y = 22.482 \cdot x - 0.629; R^2 = 0.999$$

$$cc-PVDZ: \quad y = 22.280 \cdot x - 0.602; R^2 = 0.999$$

$$cc-PVTZ: \quad y = 22.631 \cdot x - 0.647; R^2 = 0.998$$

PBE0:

$$6-31G(d): \quad y = 22.173 \cdot x - 0.607; R^2 = 0.999$$

$$6-311G(d,p): \quad y = 22.322 \cdot x - 0.620; R^2 = 0.999$$

$$cc-PVDZ: \quad y = 22.171 \cdot x - 0.603; R^2 = 0.999$$

$$cc-PVTZ: \quad y = 22.495 \cdot x - 0.640; R^2 = 0.998$$

B3LYP:

$$6-31G(d): \quad y = 22.124 \cdot x - 0.596; R^2 = 0.999$$

$$6-311G(d,p): \quad y = 22.472 \cdot x - 0.632; R^2 = 0.999$$

$$cc-PVDZ: \quad y = 22.256 \cdot x - 0.602; R^2 = 0.999$$

$$cc-PVTZ: \quad y = 22.476 \cdot x - 0.633; R^2 = 0.998$$

Electrostatic interaction energy C-N $E_{\text{intra}} V(\text{C-N})$ **Table S2.**  $E_{\text{intra}} V(\text{C,N})$  (in a.u.) for  $\text{CH}_3\text{-NH}_2$ , as a function of the method.

| R (Å) | 1/R (bohr <sup>-1</sup> ) | HF       |             |         |         |
|-------|---------------------------|----------|-------------|---------|---------|
|       |                           | 6-31G(d) | 6-311G(d,p) | cc-PVDZ | cc-PVTZ |
| 1.30  | 0.407                     | 1.338    | 1.335       | 1.326   | 1.339   |
| 1.40  | 0.378                     | 1.005    | 1.005       | 1.011   | 1.003   |
| 1.50  | 0.353                     | 0.787    | 0.786       | 0.792   | 0.784   |
| 1.60  | 0.331                     | 0.623    | 0.623       | 0.628   | 0.622   |
| 1.70  | 0.311                     | 0.497    | 0.497       | 0.502   | 0.495   |
| 1.80  | 0.294                     | 0.393    | 0.393       | 0.397   | 0.392   |
| 1.90  | 0.279                     | 0.302    | 0.302       | 0.305   | 0.300   |
| R (Å) | 1/R (bohr <sup>-1</sup> ) | PBE      |             |         |         |
|       |                           | 6-31G(d) | 6-311G(d,p) | cc-PVDZ | cc-PVTZ |
| 1.30  | 0.407                     | 1.372    | 1.386       | 1.371   | 1.391   |
| 1.40  | 0.378                     | 1.032    | 1.030       | 1.036   | 1.029   |
| 1.50  | 0.353                     | 0.805    | 0.804       | 0.810   | 0.802   |
| 1.60  | 0.331                     | 0.639    | 0.638       | 0.643   | 0.636   |
| 1.70  | 0.311                     | 0.506    | 0.506       | 0.509   | 0.505   |
| 1.80  | 0.294                     | 0.396    | 0.395       | 0.399   | 0.393   |
| 1.90  | 0.279                     | 0.294    | 0.294       | 0.296   | 0.292   |
| R (Å) | 1/R (bohr <sup>-1</sup> ) | PBE0     |             |         |         |
|       |                           | 6-31G(d) | 6-311G(d,p) | cc-PVDZ | cc-PVTZ |
| 1.30  | 0.407                     | 1.357    | 1.368       | 1.354   | 1.376   |
| 1.40  | 0.378                     | 1.021    | 1.020       | 1.025   | 1.019   |
| 1.50  | 0.353                     | 0.797    | 0.796       | 0.801   | 0.794   |
| 1.60  | 0.331                     | 0.631    | 0.630       | 0.636   | 0.627   |
| 1.70  | 0.311                     | 0.501    | 0.501       | 0.504   | 0.499   |
| 1.80  | 0.294                     | 0.391    | 0.391       | 0.394   | 0.390   |
| 1.90  | 0.279                     | 0.294    | 0.294       | 0.295   | 0.292   |
| R (Å) | 1/R (bohr <sup>-1</sup> ) | B3LYP    |             |         |         |
|       |                           | 6-31G(d) | 6-311G(d,p) | cc-PVDZ | cc-PVTZ |
| 1.30  | 0.407                     | 1.361    | 1.380       | 1.369   | 1.383   |
| 1.40  | 0.378                     | 1.024    | 1.023       | 1.029   | 1.021   |
| 1.50  | 0.353                     | 0.799    | 0.798       | 0.805   | 0.796   |
| 1.60  | 0.331                     | 0.633    | 0.632       | 0.639   | 0.629   |
| 1.70  | 0.311                     | 0.504    | 0.502       | 0.508   | 0.501   |
| 1.80  | 0.294                     | 0.395    | 0.393       | 0.398   | 0.392   |
| 1.90  | 0.279                     | 0.296    | 0.297       | 0.299   | 0.296   |

The linear regression fittings for intra-basin electrostatic energy in the C–N bond are the following:

HF:

$$6\text{-}31\text{G}(d): \quad y = 7.876 \cdot x - 1.940; R^2 = 0.983$$

$$6\text{-}311\text{G}(d,p): \quad y = 7.857 \cdot x - 1.934; R^2 = 0.984$$

$$\text{cc-PVDZ}: \quad y = 7.795 \cdot x - 1.911; R^2 = 0.986$$

$$\text{cc-PVTZ}: \quad y = 7.885 \cdot x - 1.945; R^2 = 0.983$$

PBE:

$$6\text{-}31\text{G}(d): \quad y = 8.181 \cdot x - 2.029; R^2 = 0.986$$

$$6\text{-}311\text{G}(d,p): \quad y = 8.247 \cdot x - 2.050; R^2 = 0.983$$

$$\text{cc-PVDZ}: \quad y = 8.159 \cdot x - 2.018; R^2 = 0.987$$

$$\text{cc-PVTZ}: \quad y = 8.290 \cdot x - 2.065; R^2 = 0.982$$

PBE0:

$$6\text{-}31\text{G}(d): \quad y = 8.075 \cdot x - 2.000; R^2 = 0.985$$

$$6\text{-}311\text{G}(d,p): \quad y = 8.129 \cdot x - 2.018; R^2 = 0.983$$

$$\text{cc-PVDZ}: \quad y = 8.049 \cdot x - 1.989; R^2 = 0.987$$

$$\text{cc-PVTZ}: \quad y = 8.190 \cdot x - 2.038; R^2 = 0.982$$

B3LYP:

$$6\text{-}31\text{G}(d): \quad y = 8.084 \cdot x - 2.000; R^2 = 0.985$$

$$6\text{-}311\text{G}(d,p): \quad y = 8.187 \cdot x - 2.033; R^2 = 0.982$$

$$\text{cc-PVDZ}: \quad y = 8.121 \cdot x - 2.008; R^2 = 0.985$$

$$\text{cc-PVTZ}: \quad y = 8.208 \cdot x - 2.042; R^2 = 0.981$$



$E_{inter} C(C)-V(C,N)$ **Table S3.**  $E_{inter} C(C)-V(C,N)$  (in a.u.) for  $CH_3-NH_2$ , as a function of the method.

| R (Å) | 1/R (bohr <sup>-1</sup> ) | HF       |             |         |         |
|-------|---------------------------|----------|-------------|---------|---------|
|       |                           | 6-31G(d) | 6-311G(d,p) | cc-PVDZ | cc-PVTZ |
| 1.30  | 0.407                     | -5.340   | -5.338      | -5.333  | -5.339  |
| 1.40  | 0.378                     | -4.532   | -4.533      | -4.551  | -4.527  |
| 1.50  | 0.353                     | -3.918   | -3.918      | -3.936  | -3.911  |
| 1.60  | 0.331                     | -3.416   | -3.418      | -3.439  | -3.412  |
| 1.70  | 0.311                     | -3.003   | -3.005      | -3.027  | -2.995  |
| 1.80  | 0.294                     | -2.644   | -2.643      | -2.666  | -2.635  |
| 1.90  | 0.279                     | -2.310   | -2.307      | -2.330  | -2.297  |
| R (Å) | 1/R (bohr <sup>-1</sup> ) | PBE      |             |         |         |
|       |                           | 6-31G(d) | 6-311G(d,p) | cc-PVDZ | cc-PVTZ |
| 1.30  | 0.407                     | -5.412   | -5.428      | -5.333  | -5.339  |
| 1.40  | 0.378                     | -4.598   | -4.594      | -4.551  | -4.527  |
| 1.50  | 0.353                     | -3.976   | -3.972      | -3.936  | -3.911  |
| 1.60  | 0.331                     | -3.475   | -3.471      | -3.439  | -3.412  |
| 1.70  | 0.311                     | -3.051   | -3.047      | -3.027  | -2.995  |
| 1.80  | 0.294                     | -2.676   | -2.671      | -2.666  | -2.635  |
| 1.90  | 0.279                     | -2.311   | -2.308      | -2.330  | -2.297  |
| R (Å) | 1/R (bohr <sup>-1</sup> ) | PBE0     |             |         |         |
|       |                           | 6-31G(d) | 6-311G(d,p) | cc-PVDZ | cc-PVTZ |
| 1.30  | 0.407                     | -5.382   | -5.395      | -5.386  | -5.401  |
| 1.40  | 0.378                     | -4.570   | -4.567      | -4.585  | -4.563  |
| 1.50  | 0.353                     | -3.951   | -3.948      | -3.968  | -3.942  |
| 1.60  | 0.331                     | -3.450   | -3.445      | -3.468  | -3.438  |
| 1.70  | 0.311                     | -3.031   | -3.027      | -3.046  | -3.019  |
| 1.80  | 0.294                     | -2.655   | -2.653      | -2.672  | -2.645  |
| 1.90  | 0.279                     | -2.304   | -2.301      | -2.317  | -2.289  |
| R (Å) | 1/R (bohr <sup>-1</sup> ) | B3LYP    |             |         |         |
|       |                           | 6-31G(d) | 6-311G(d,p) | cc-PVDZ | cc-PVTZ |
| 1.30  | 0.407                     | -7.809   | -7.895      | -7.841  | -7.908  |
| 1.40  | 0.378                     | -6.527   | -6.523      | -6.542  | -6.520  |
| 1.50  | 0.353                     | -5.572   | -5.570      | -5.591  | -5.569  |
| 1.60  | 0.331                     | -4.800   | -4.796      | -4.824  | -4.785  |
| 1.70  | 0.311                     | -4.131   | -4.124      | -4.141  | -4.122  |
| 1.80  | 0.294                     | -3.512   | -3.496      | -3.513  | -3.500  |
| 1.90  | 0.279                     | -2.852   | -2.867      | -2.860  | -2.866  |

Fittings for  $E_{inter} C(C)-V(C,N)$ :

## HF:

$$6-31G(d): \quad y = -23.288 \cdot x + 4.231; R^2 = 0.997$$

$$6-311G(d,p): \quad y = -23.296 \cdot x + 4.234; R^2 = 0.997$$

$$cc-PVDZ: \quad y = -23.120 \cdot x + 4.158; R^2 = 0.998$$

$$cc-PVTZ: \quad y = -23.365 \cdot x + 4.264; R^2 = 0.997$$

## PBE:

$$6-31G(d): \quad y = -23.749 \cdot x + 4.338; R^2 = 0.998$$

$$6-311G(d,p): \quad y = -23.867 \cdot x + 4.379; R^2 = 0.997$$

$$cc-PVDZ: \quad y = -23.120 \cdot x + 4.158; R^2 = 0.998$$

$$cc-PVTZ: \quad y = -23.365 \cdot x + 4.264; R^2 = 0.997$$

## PBE0:

$$6-31G(d): \quad y = -23.608 \cdot x + 4.313; R^2 = 0.998$$

$$6-311G(d,p): \quad y = -23.699 \cdot x + 4.345; R^2 = 0.997$$

$$cc-PVDZ: \quad y = -23.557 \cdot x + 4.282; R^2 = 0.998$$

$$cc-PVTZ: \quad y = -23.815 \cdot x + 4.389; R^2 = 0.997$$

## B3LYP:

$$6-31G(d): \quad y = -23.623 \cdot x + 4.313; R^2 = 0.998$$

$$6-311G(d,p): \quad y = -23.763 \cdot x + 4.361; R^2 = 0.997$$

$$cc-PVDZ: \quad y = -23.616 \cdot x + 4.291; R^2 = 0.997$$

$$cc-PVTZ: \quad y = -23.827 \cdot x + 4.390; R^2 = 0.997$$

$E_{inter} C(N)-V(C,N)$ **Table S4.**  $E_{inter} C(N)-V(C,N)$  (in a.u.) for  $CH_3-NH_2$ , as a function of the method.

| R (Å) | 1/R (bohr <sup>-1</sup> ) | HF       |             |         |         |
|-------|---------------------------|----------|-------------|---------|---------|
|       |                           | 6-31G(d) | 6-311G(d,p) | cc-PVDZ | cc-PVTZ |
| 1.30  | 0.407                     | -7.740   | -7.728      | -7.681  | -7.745  |
| 1.40  | 0.378                     | -6.459   | -6.455      | -6.477  | -6.451  |
| 1.50  | 0.353                     | -5.532   | -5.527      | -5.545  | -5.518  |
| 1.60  | 0.331                     | -4.764   | -4.763      | -4.775  | -4.760  |
| 1.70  | 0.311                     | -4.106   | -4.109      | -4.123  | -4.096  |
| 1.80  | 0.294                     | -3.504   | -3.503      | -3.524  | -3.501  |
| 1.90  | 0.279                     | -2.917   | -2.921      | -2.921  | -2.911  |
| R (Å) | 1/R (bohr <sup>-1</sup> ) | PBE      |             |         |         |
|       |                           | 6-31G(d) | 6-311G(d,p) | cc-PVDZ | cc-PVTZ |
| 1.30  | 0.407                     | -7.849   | -7.901      | -7.833  | -7.925  |
| 1.40  | 0.378                     | -6.557   | -6.547      | -6.563  | -6.547  |
| 1.50  | 0.353                     | -5.592   | -5.588      | -5.612  | -5.585  |
| 1.60  | 0.331                     | -4.821   | -4.818      | -4.831  | -4.813  |
| 1.70  | 0.311                     | -4.131   | -4.135      | -4.138  | -4.134  |
| 1.80  | 0.294                     | -3.497   | -3.496      | -3.511  | -3.486  |
| 1.90  | 0.279                     | -2.825   | -2.838      | -2.837  | -2.828  |
| R (Å) | 1/R (bohr <sup>-1</sup> ) | PBEO     |             |         |         |
|       |                           | 6-31G(d) | 6-311G(d,p) | cc-PVDZ | cc-PVTZ |
| 1.30  | 0.407                     | -7.796   | -7.842      | -7.778  | -7.886  |
| 1.40  | 0.378                     | -6.511   | -6.511      | -6.522  | -6.509  |
| 1.50  | 0.353                     | -5.561   | -5.559      | -5.573  | -5.556  |
| 1.60  | 0.331                     | -4.785   | -4.781      | -4.804  | -4.773  |
| 1.70  | 0.311                     | -4.114   | -4.114      | -4.121  | -4.105  |
| 1.80  | 0.294                     | -3.474   | -3.482      | -3.486  | -3.481  |
| 1.90  | 0.279                     | -2.835   | -2.846      | -2.837  | -2.836  |
| R (Å) | 1/R (bohr <sup>-1</sup> ) | B3LYP    |             |         |         |
|       |                           | 6-31G(d) | 6-311G(d,p) | cc-PVDZ | cc-PVTZ |
| 1.30  | 0.407                     | -7.809   | -7.895      | -7.841  | -7.908  |
| 1.40  | 0.378                     | -6.527   | -6.523      | -6.542  | -6.520  |
| 1.50  | 0.353                     | -5.572   | -5.570      | -5.591  | -5.569  |
| 1.60  | 0.331                     | -4.800   | -4.796      | -4.824  | -4.785  |
| 1.70  | 0.311                     | -4.131   | -4.124      | -4.141  | -4.122  |
| 1.80  | 0.294                     | -3.512   | -3.496      | -3.513  | -3.500  |
| 1.90  | 0.279                     | -2.852   | -2.867      | -2.860  | -2.866  |

Fittings for  $E_{inter} C(N)-V(C,N)$ :

HF:

$$6-31G(d): \quad y = -36.780 \cdot x + 7.357; R^2 = 0.998$$

$$6-311G(d,p): \quad y = -36.670 \cdot x + 7.322; R^2 = 0.998$$

$$cc-PVDZ: \quad y = -36.406 \cdot x + 7.228; R^2 = 0.999$$

$$cc-PVTZ: \quad y = -36.816 \cdot x + 7.375; R^2 = 0.998$$

PBE:

$$6-31G(d): \quad y = -38.143 \cdot x + 7.779; R^2 = 0.998$$

$$6-311G(d,p): \quad y = -38.338 \cdot x + 7.837; R^2 = 0.998$$

$$cc-PVDZ: \quad y = -38.000 \cdot x + 7.120; R^2 = 0.999$$

$$cc-PVTZ: \quad y = -38.544 \cdot x + 7.908; R^2 = 0.997$$

PBE0:

$$6-31G(d): \quad y = -37.736 \cdot x + 7.670; R^2 = 0.998$$

$$6-311G(d,p): \quad y = -37.920 \cdot x + 7.724; R^2 = 0.998$$

$$cc-PVDZ: \quad y = -37.617 \cdot x + 7.624; R^2 = 0.999$$

$$cc-PVTZ: \quad y = -38.218 \cdot x + 7.822; R^2 = 0.997$$

B3LYP:

$$6-31G(d): \quad y = -37.637 \cdot x + 7.619; R^2 = 0.998$$

$$6-311G(d,p): \quad y = -38.094 \cdot x + 7.763; R^2 = 0.997$$

$$cc-PVDZ: \quad y = -37.817 \cdot x + 7.664; R^2 = 0.998$$

$$cc-PVTZ: \quad y = -38.160 \cdot x + 7.785; R^2 = 0.997$$

Exchange–correlation energy $E_{x-c}C(C)-V(C,N)$ **Table S5.**  $E_{x-c}C(C)-V(C,N)$  (in a.u.) for  $\text{CH}_3\text{-NH}_2$ , as a function of the method.

| R (Å) | $1/R^2$ (bohr <sup>-2</sup> ) | HF       |             |         |         |
|-------|-------------------------------|----------|-------------|---------|---------|
|       |                               | 6-31G(d) | 6-311G(d,p) | cc-PVDZ | cc-PVTZ |
| 1.30  | 0.166                         | -0.062   | -0.062      | -0.062  | -0.062  |
| 1.40  | 0.143                         | -0.051   | -0.051      | -0.052  | -0.051  |
| 1.50  | 0.124                         | -0.043   | -0.043      | -0.043  | -0.043  |
| 1.60  | 0.109                         | -0.036   | -0.036      | -0.037  | -0.036  |
| 1.70  | 0.097                         | -0.031   | -0.031      | -0.032  | -0.031  |
| 1.80  | 0.086                         | -0.027   | -0.027      | -0.027  | -0.027  |
| 1.90  | 0.078                         | -0.023   | -0.023      | -0.024  | -0.023  |
| R (Å) | $1/R^2$ (bohr <sup>-2</sup> ) | PBE      |             |         |         |
|       |                               | 6-31G(d) | 6-311G(d,p) | cc-PVDZ | cc-PVTZ |
| 1.30  | 0.166                         | -0.063   | -0.063      | -0.063  | -0.063  |
| 1.40  | 0.143                         | -0.052   | -0.052      | -0.052  | -0.052  |
| 1.50  | 0.124                         | -0.044   | -0.044      | -0.044  | -0.043  |
| 1.60  | 0.109                         | -0.037   | -0.037      | -0.038  | -0.037  |
| 1.70  | 0.097                         | -0.032   | -0.032      | -0.033  | -0.032  |
| 1.80  | 0.086                         | -0.028   | -0.028      | -0.028  | -0.028  |
| 1.90  | 0.078                         | -0.024   | -0.024      | -0.024  | -0.023  |
| R (Å) | $1/R^2$ (bohr <sup>-2</sup> ) | PBEO     |             |         |         |
|       |                               | 6-31G(d) | 6-311G(d,p) | cc-PVDZ | cc-PVTZ |
| 1.30  | 0.166                         | -0.062   | -0.062      | -0.063  | -0.062  |
| 1.40  | 0.143                         | -0.052   | -0.052      | -0.052  | -0.051  |
| 1.50  | 0.124                         | -0.043   | -0.043      | -0.044  | -0.043  |
| 1.60  | 0.109                         | -0.037   | -0.037      | -0.037  | -0.037  |
| 1.70  | 0.097                         | -0.032   | -0.032      | -0.032  | -0.032  |
| 1.80  | 0.086                         | -0.028   | -0.028      | -0.028  | -0.027  |
| 1.90  | 0.078                         | -0.024   | -0.024      | -0.024  | -0.023  |
| R (Å) | $1/R^2$ (bohr <sup>-2</sup> ) | B3LYP    |             |         |         |
|       |                               | 6-31G(d) | 6-311G(d,p) | cc-PVDZ | cc-PVTZ |
| 1.30  | 0.166                         | -0.062   | -0.062      | -0.063  | -0.062  |
| 1.40  | 0.143                         | -0.052   | -0.052      | -0.052  | -0.051  |
| 1.50  | 0.124                         | -0.043   | -0.043      | -0.044  | -0.043  |
| 1.60  | 0.109                         | -0.037   | -0.037      | -0.037  | -0.037  |
| 1.70  | 0.097                         | -0.032   | -0.032      | -0.032  | -0.031  |
| 1.80  | 0.086                         | -0.027   | -0.027      | -0.028  | -0.027  |
| 1.90  | 0.078                         | -0.023   | -0.023      | -0.024  | -0.023  |

## Fittings for Exchange–Correlation C(C)-V(C,N):

## HF:

$$6-31G(d): \quad y = -0.436 \cdot x + 0.011; R^2 = 0.999$$

$$6-311G(d,p): \quad y = -0.439 \cdot x + 0.011; R^2 = 0.999$$

$$cc-PVDZ: \quad y = -0.434 \cdot x + 0.010; R^2 = 0.999$$

$$cc-PVTZ: \quad y = -0.439 \cdot x + 0.012; R^2 = 0.999$$

## PBE:

$$6-31G(d): \quad y = -0.4377 \cdot x + 0.010; R^2 = 0.999$$

$$6-311G(d,p): \quad y = -0.439 \cdot x + 0.011; R^2 = 0.999$$

$$cc-PVDZ: \quad y = -0.437 \cdot x + 0.010; R^2 = 0.999$$

$$cc-PVTZ: \quad y = -0.439 \cdot x + 0.011; R^2 = 0.999$$

## PBE0:

$$6-31G(d): \quad y = -0.436 \cdot x + 0.010; R^2 = 0.999$$

$$6-311G(d,p): \quad y = -0.437 \cdot x + 0.011; R^2 = 0.999$$

$$cc-PVDZ: \quad y = -0.439 \cdot x + 0.011; R^2 = 0.999$$

$$cc-PVTZ: \quad y = -0.436 \cdot x + 0.011; R^2 = 0.999$$

## B3LYP:

$$6-31G(d): \quad y = -0.439 \cdot x + 0.011; R^2 = 0.999$$

$$6-311G(d,p): \quad y = -0.438 \cdot x + 0.061; R^2 = 0.999$$

$$cc-PVDZ: \quad y = -0.437 \cdot x + 0.060; R^2 = 0.999$$

$$cc-PVTZ: \quad y = -0.439 \cdot x + 0.061; R^2 = 0.999$$

$E_{x-c}C(N)-V(C,N)$ **Table S6.**  $E_{x-c}C(N)-V(C,N)$  (in a.u.) for  $\text{CH}_3\text{-NH}_2$ , as a function of the method.

| R (Å) | $1/R^2$ (bohr <sup>-2</sup> ) | HF       |             |         |         |
|-------|-------------------------------|----------|-------------|---------|---------|
|       |                               | 6-31G(d) | 6-311G(d,p) | cc-PVDZ | cc-PVTZ |
| 1.30  | 0.166                         | -0.086   | -0.086      | -0.085  | -0.086  |
| 1.40  | 0.143                         | -0.067   | -0.067      | -0.068  | -0.067  |
| 1.50  | 0.124                         | -0.055   | -0.055      | -0.055  | -0.055  |
| 1.60  | 0.109                         | -0.045   | -0.045      | -0.045  | -0.045  |
| 1.70  | 0.097                         | -0.037   | -0.037      | -0.037  | -0.036  |
| 1.80  | 0.086                         | -0.029   | -0.029      | -0.030  | -0.029  |
| 1.90  | 0.078                         | -0.022   | -0.022      | -0.022  | -0.022  |
| R (Å) | $1/R^2$ (bohr <sup>-2</sup> ) | PBE      |             |         |         |
|       |                               | 6-31G(d) | 6-311G(d,p) | cc-PVDZ | cc-PVTZ |
| 1.30  | 0.166                         | -0.087   | -0.088      | -0.087  | -0.088  |
| 1.40  | 0.143                         | -0.069   | -0.069      | -0.069  | -0.069  |
| 1.50  | 0.124                         | -0.055   | -0.055      | -0.056  | -0.055  |
| 1.60  | 0.109                         | -0.046   | -0.046      | -0.046  | -0.046  |
| 1.70  | 0.097                         | -0.037   | -0.037      | -0.036  | -0.037  |
| 1.80  | 0.086                         | -0.029   | -0.029      | -0.029  | -0.029  |
| 1.90  | 0.078                         | -0.021   | -0.022      | -0.022  | -0.021  |
| R (Å) | $1/R^2$ (bohr <sup>-2</sup> ) | PBEO     |             |         |         |
|       |                               | 6-31G(d) | 6-311G(d,p) | cc-PVDZ | cc-PVTZ |
| 1.30  | 0.166                         | -0.086   | -0.087      | -0.086  | -0.088  |
| 1.40  | 0.143                         | -0.068   | -0.068      | -0.068  | -0.068  |
| 1.50  | 0.124                         | -0.055   | -0.055      | -0.055  | -0.055  |
| 1.60  | 0.109                         | -0.045   | -0.045      | -0.046  | -0.045  |
| 1.70  | 0.097                         | -0.037   | -0.037      | -0.037  | -0.037  |
| 1.80  | 0.086                         | -0.029   | -0.029      | -0.029  | -0.029  |
| 1.90  | 0.078                         | -0.021   | -0.021      | -0.021  | -0.021  |
| R (Å) | $1/R^2$ (bohr <sup>-2</sup> ) | B3LYP    |             |         |         |
|       |                               | 6-31G(d) | 6-311G(d,p) | cc-PVDZ | cc-PVTZ |
| 1.30  | 0.166                         | -0.086   | -0.088      | -0.087  | -0.088  |
| 1.40  | 0.143                         | -0.068   | -0.068      | -0.069  | -0.068  |
| 1.50  | 0.124                         | -0.055   | -0.055      | -0.055  | -0.055  |
| 1.60  | 0.109                         | -0.045   | -0.045      | -0.046  | -0.045  |
| 1.70  | 0.097                         | -0.037   | -0.037      | -0.037  | -0.037  |
| 1.80  | 0.086                         | -0.030   | -0.029      | -0.029  | -0.030  |
| 1.90  | 0.078                         | -0.021   | -0.022      | -0.022  | -0.022  |

## Fittings for Exchange–Correlation C(N)-V(C,N):

## HF:

$$6-31G(d): \quad y = -0.706 \cdot x + 0.032; R^2 = 0.999$$

$$6-311G(d,p): \quad y = -0.705 \cdot x + 0.032; R^2 = 0.999$$

$$cc-PVDZ: \quad y = -0.695 \cdot x + 0.031; R^2 = 0.999$$

$$cc-PVTZ: \quad y = -0.715 \cdot x + 0.033; R^2 = 0.999$$

## PBE:

$$6-31G(d): \quad y = -0.734 \cdot x + 0.035; R^2 = 0.999$$

$$6-311G(d,p): \quad y = -0.731 \cdot x + 0.035; R^2 = 0.998$$

$$cc-PVDZ: \quad y = -0.728 \cdot x + 0.034; R^2 = 0.999$$

$$cc-PVTZ: \quad y = -0.738 \cdot x + 0.035; R^2 = 0.998$$

## PBE0:

$$6-31G(d): \quad y = -0.720 \cdot x + 0.034; R^2 = 0.999$$

$$6-311G(d,p): \quad y = -0.729 \cdot x + 0.035; R^2 = 0.998$$

$$cc-PVDZ: \quad y = -0.723 \cdot x + 0.034; R^2 = 0.999$$

$$cc-PVTZ: \quad y = -0.734 \cdot x + 0.035; R^2 = 0.998$$

## B3LYP:

$$6-31G(d): \quad y = -0.714 \cdot x + 0.033; R^2 = 0.999$$

$$6-311G(d,p): \quad y = -0.734 \cdot x + 0.035; R^2 = 0.998$$

$$cc-PVDZ: \quad y = -0.726 \cdot x + 0.034; R^2 = 0.999$$

$$cc-PVTZ: \quad y = -0.731 \cdot x + 0.035; R^2 = 0.998$$



## Integration errors

ELF-IQA integration errors were calculated as the difference between the reference DFT energy and the ELF-IQA energy. Notice that in all molecules, relative errors were lower than 1% but for Li<sub>2</sub>, which presented a relative error of about 4.2%.

**Table S7.** DFT energy (computed at the B3LYP/6-31G(*d*) level of theory), ELF-IQA energy computed using B3LYP/6-31G(*d*) wavefunctions, integration error with respect to DFT calculations and relative integration error for the set of molecules considered in this work.

| CH <sub>3</sub> -CH <sub>3</sub> |              |                  |           |        |
|----------------------------------|--------------|------------------|-----------|--------|
| R (Å)                            | E DFT (a.u.) | E ELF-IQA (a.u.) | ΔE (a.u.) | ΔE (%) |
| 1.20                             | -79.7309     | -79.1050         | 0.63      | -0.78  |
| 1.30                             | -79.7910     | -79.1681         | 0.62      | -0.78  |
| 1.40                             | -79.8200     | -79.2057         | 0.61      | -0.77  |
| 1.50                             | -79.8299     | -79.2150         | 0.61      | -0.77  |
| 1.60                             | -79.8284     | -79.2051         | 0.62      | -0.78  |
| 1.70                             | -79.8200     | -79.1952         | 0.62      | -0.78  |
| 1.80                             | -79.8080     | -79.1819         | 0.63      | -0.78  |
| 1.53                             | -79.8304     | -79.2060         | 0.62      | -0.78  |
| CH <sub>3</sub> -NH <sub>2</sub> |              |                  |           |        |
| R (Å)                            | E DFT (a.u.) | E ELF-IQA (a.u.) | ΔE (a.u.) | ΔE (%) |
| 1.30                             | -95.8337     | -95.1726         | 0.66      | -0.69  |
| 1.40                             | -95.8507     | -95.1947         | 0.66      | -0.68  |
| 1.50                             | -95.8526     | -95.1844         | 0.67      | -0.70  |
| 1.60                             | -95.8460     | -95.1882         | 0.66      | -0.69  |
| 1.70                             | -95.8348     | -95.1661         | 0.67      | -0.70  |
| 1.80                             | -95.8214     | -95.1501         | 0.67      | -0.70  |
| 1.90                             | -95.8072     | -95.1484         | 0.66      | -0.69  |
| 1.47                             | -95.8497     | -95.1939         | 0.66      | -0.68  |
| CH <sub>3</sub> -OH              |              |                  |           |        |
| R (Å)                            | E DFT (a.u.) | E ELF-IQA (a.u.) | ΔE (a.u.) | ΔE (%) |
| 1.20                             | -115.6712    | -114.9549        | 0.72      | -0.62  |
| 1.30                             | -115.7043    | -115.0152        | 0.69      | -0.60  |
| 1.40                             | -115.7142    | -115.0347        | 0.68      | -0.59  |
| 1.50                             | -115.7112    | -115.0398        | 0.67      | -0.58  |
| 1.60                             | -115.7013    | -115.0416        | 0.66      | -0.57  |
| 1.70                             | -115.6877    | -115.0305        | 0.66      | -0.57  |
| 1.80                             | -115.6727    | -115.0368        | 0.64      | -0.55  |
| 1.90                             | -115.6573    | -114.9960        | 0.66      | -0.57  |
| 1.41                             | -115.7144    | -115.0451        | 0.67      | -0.58  |

| CH <sub>3</sub> -F |              |                  |           |        |
|--------------------|--------------|------------------|-----------|--------|
| R (Å)              | E DFT (a.u.) | E ELF-IQA (a.u.) | ΔE (a.u.) | ΔE (%) |
| 1.10               | -139.6398    | -138.9749        | 0.66      | -0.48  |
| 1.20               | -139.7030    | -139.0135        | 0.69      | -0.49  |
| 1.30               | -139.7288    | -139.0521        | 0.68      | -0.48  |
| 1.40               | -139.7337    | -139.0445        | 0.69      | -0.49  |
| 1.50               | -139.7272    | -139.0372        | 0.69      | -0.49  |
| 1.60               | -139.7146    | -139.0368        | 0.68      | -0.49  |
| 1.70               | -139.6991    | -138.9389        | 0.76      | -0.54  |
| 1.38               | -139.7339    | -139.0410        | 0.69      | -0.50  |

## Evolution of the energetic terms and linear fittings

### Electrostatic interaction energy

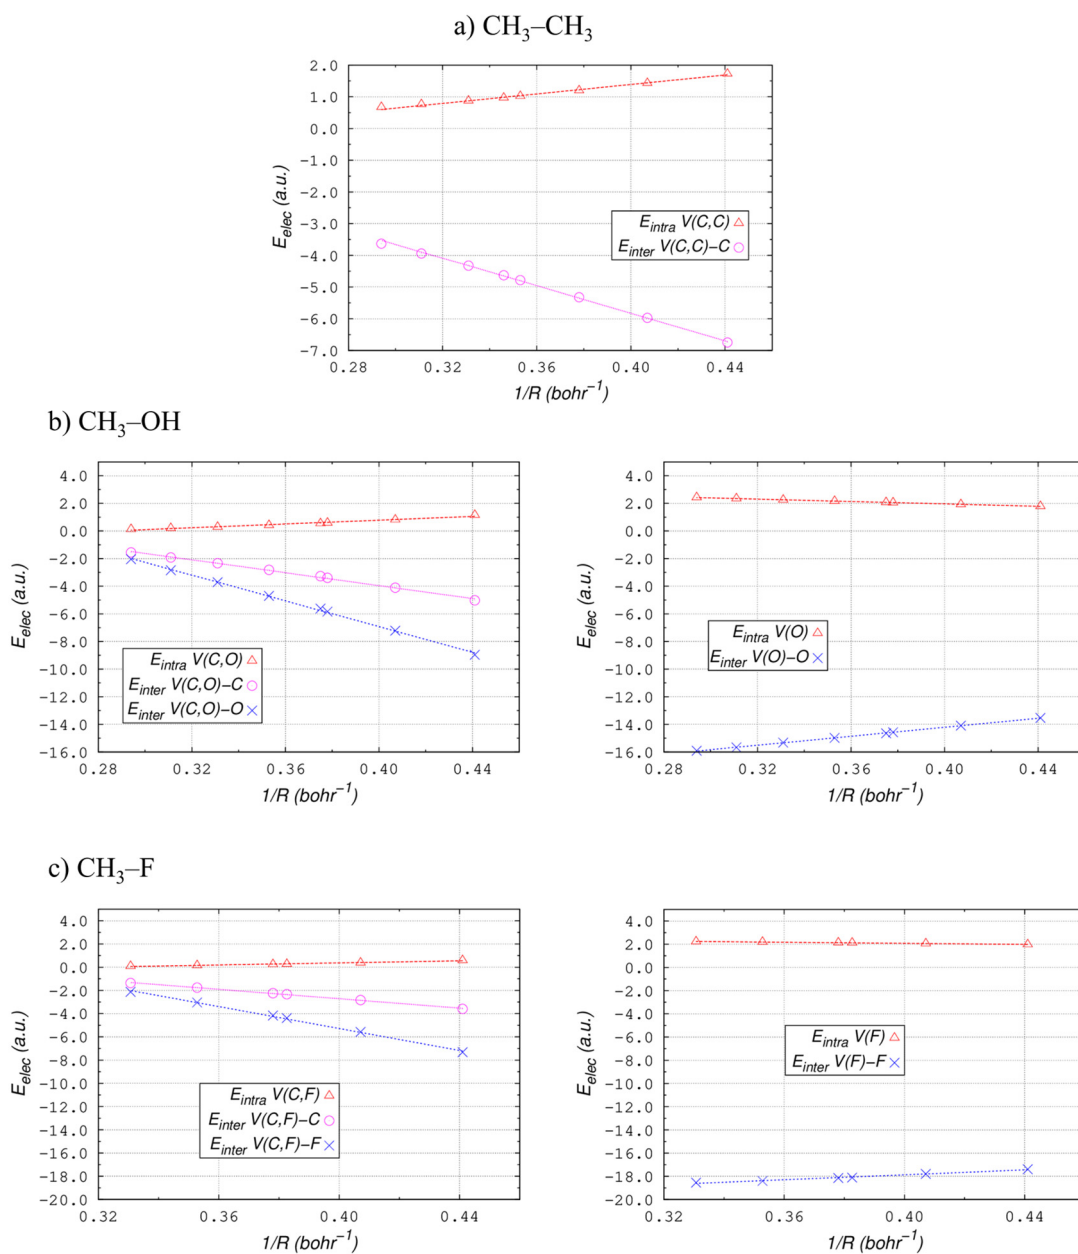

**Figure S4.** ELF-IQA computed classical electrostatic interaction energy (*intra* and *inter*) against  $1/R$  for a)  $\text{CH}_3\text{-CH}_3$ , b)  $\text{CH}_3\text{-OH}$ , and c)  $\text{CH}_3\text{-F}$ .

The linear regression fittings for CH<sub>3</sub>-X set of molecules are the following:

CH<sub>3</sub>-CH<sub>3</sub>:

$$E_{\text{intra}} V(\text{C},\text{C}): \quad y = 7.459 \cdot x - 1.595; R^2 = 0.995$$

$$E_{\text{inter}} V(\text{C},\text{C})-\text{C}: y = -21.717 \cdot x + 2.860; R^2 = 0.999$$

CH<sub>3</sub>-NH<sub>2</sub>:

$$E_{\text{intra}} V(\text{C},\text{N}): \quad y = 7.950 \cdot x - 1.966; R^2 = 0.978$$

$$E_{\text{inter}} V(\text{C},\text{N})-\text{C}: y = -23.366 \cdot x + 4.246; R^2 = 0.995$$

$$E_{\text{inter}} V(\text{C},\text{N})-\text{N}: y = -37.311 \cdot x + 7.535; R^2 = 0.996$$

$$E_{\text{intra}} V(\text{N}): \quad y = -5.736 \cdot x + 3.509; R^2 = 0.989$$

$$E_{\text{inter}} V(\text{N})-\text{N}: \quad y = 20.609 \cdot x - 16.949; R^2 = 0.994$$

CH<sub>3</sub>-OH:

$$E_{\text{intra}} V(\text{C},\text{O}): \quad y = 6.827 \cdot x - 1.951; R^2 = 0.972$$

$$E_{\text{inter}} V(\text{C},\text{O})-\text{C}: y = -23.329 \cdot x + 5.375; R^2 = 0.996$$

$$E_{\text{inter}} V(\text{C},\text{O})-\text{O}: y = -46.533 \cdot x + 11.693; R^2 = 0.999$$

$$E_{\text{intra}} V(\text{O}): \quad y = -4.330 \cdot x + 3.690; R^2 = 0.999$$

$$E_{\text{inter}} V(\text{O})-\text{O}: \quad y = 16.219 \cdot x - 20.700; R^2 = 1.000$$

CH<sub>3</sub>-F:

$$E_{\text{intra}} V(\text{C},\text{F}): \quad y = 4.498 \cdot x - 1.428; R^2 = 0.975$$

$$E_{\text{inter}} V(\text{C},\text{F})-\text{C}: y = -20.205 \cdot x + 5.369; R^2 = 0.997$$

$$E_{\text{inter}} V(\text{C},\text{F})-\text{F}: y = -47.220 \cdot x + 13.608; R^2 = 0.998$$

$$E_{\text{intra}} V(\text{F}): \quad y = -2.382 \cdot x + 3.029; R^2 = 0.994$$

$$E_{\text{inter}} V(\text{F})-\text{F}: \quad y = 10.664 \cdot x - 22.138; R^2 = 0.988$$

CH<sub>3</sub>-X Interbasin Electrostatic interaction energy as a function of  $q_1 \cdot q_2/R$

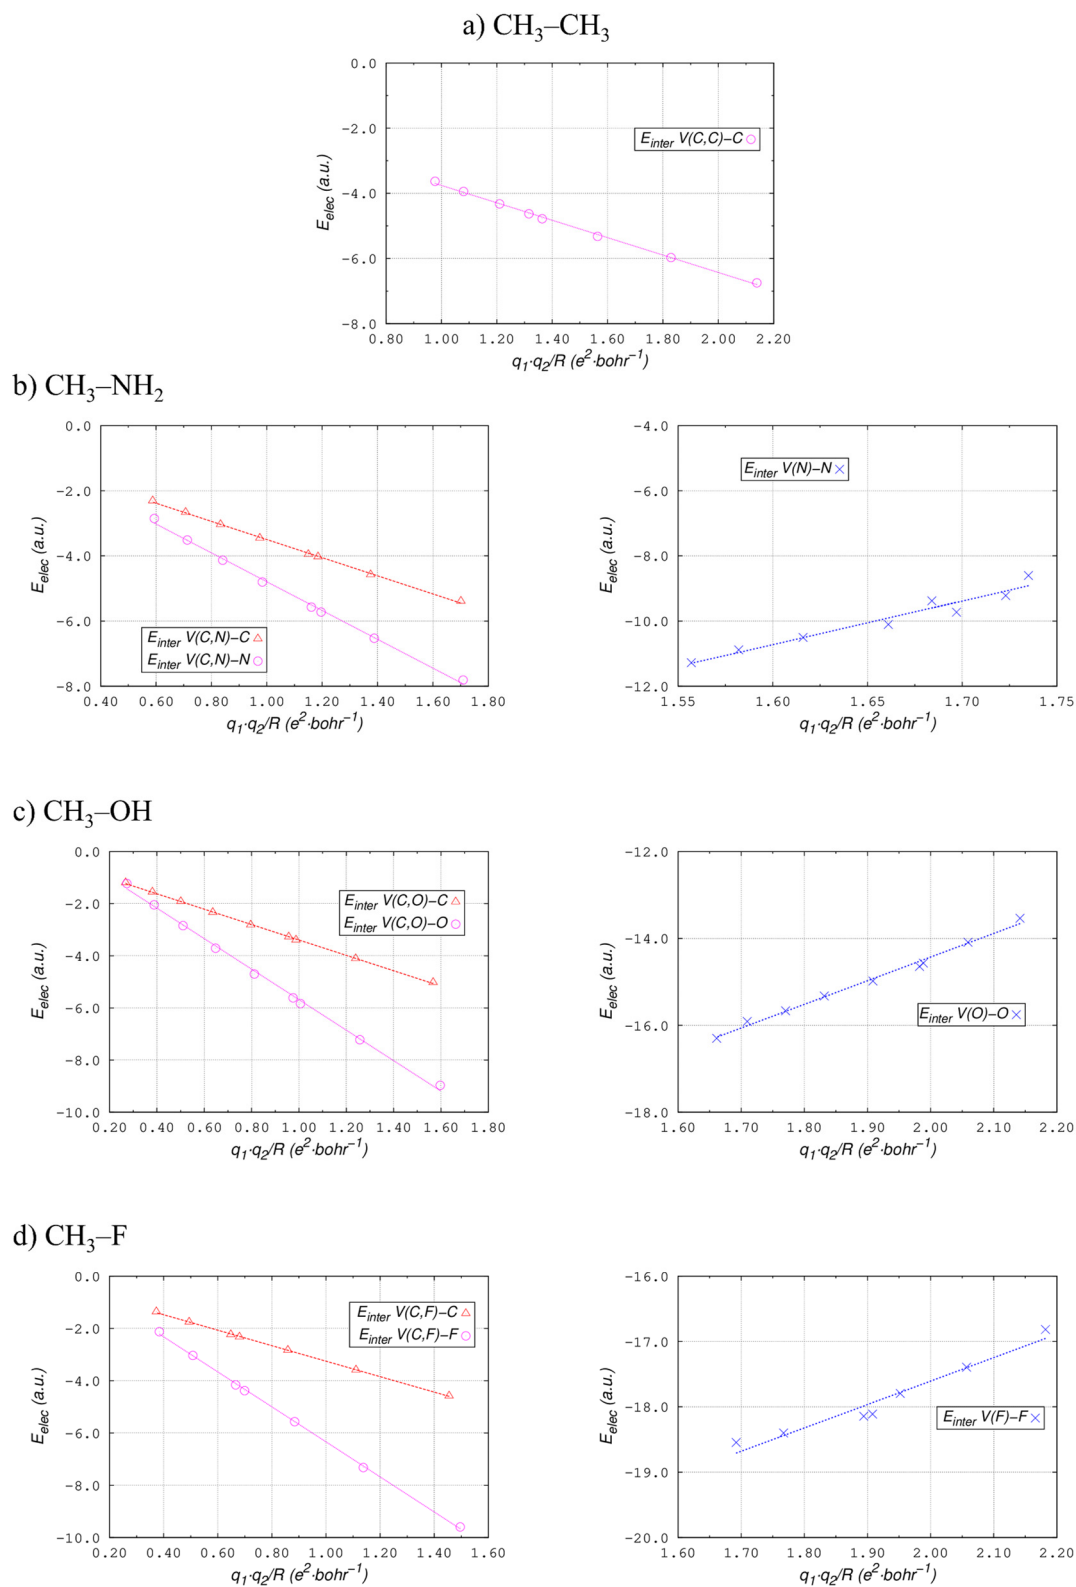

**Figure S5.** ELF-IQA computed classical electrostatic interaction energy (*intra* and *inter*) against  $q_1 \cdot q_2/R$  for a) CH<sub>3</sub>-CH<sub>3</sub>, b) CH<sub>3</sub>-NH<sub>2</sub>, c) CH<sub>3</sub>-OH, and d) CH<sub>3</sub>-F.

The linear regression fittings for CH<sub>3</sub>-X set of molecules are the following:

CH<sub>3</sub>-CH<sub>3</sub>:

$$E_{inter} V(C,C)-C: y = -2.672 \cdot x - 1.085; R^2 = 0.998$$

CH<sub>3</sub>-NH<sub>2</sub>:

$$E_{inter} V(C,N)-C: y = -2.785 \cdot x - 0.712; R^2 = 0.999$$

$$E_{inter} V(C,N)-N: y = -4.422 \cdot x - 0.369; R^2 = 0.997$$

$$E_{inter} V(N)-N: y = 13.387 \cdot x - 32.141; R^2 = 0.956$$

CH<sub>3</sub>-OH:

$$E_{inter} V(C,O)-C: y = -2.953 \cdot x - 0.441; R^2 = 1.000$$

$$E_{inter} V(C,O)-O: y = -5.851 \cdot x + 0.169; R^2 = 0.997$$

$$E_{inter} V(O)-O: y = 5.441 \cdot x - 25.311; R^2 = 0.992$$

CH<sub>3</sub>-F:

$$E_{inter} V(C,F)-C: y = -2.960 \cdot x - 9.292; R^2 = 1.000$$

$$E_{inter} V(C,F)-F: y = -6.700 \cdot x + 0.358; R^2 = 0.999$$

$$E_{inter} V(F)-F: y = 3.581 \cdot x - 24.768; R^2 = 0.954$$

## Kinetic energy

### Demonstration

Assuming a homogeneous electron gas kinetic energy density (Thomas-Fermi gas) within the basin, the kinetic energy would be given by:

$$T = C_F \int \rho^{5/3} dV = 4\pi C_F \int \left(\frac{q}{r^3}\right)^{5/3} r^2 dr = 4\pi C_F q^{5/3} \int \frac{1}{r^3} dr = \frac{-4\pi C_F q^{5/3}}{3} \frac{1}{r^2}$$

Where  $C_F$  is the Fermi Constant.

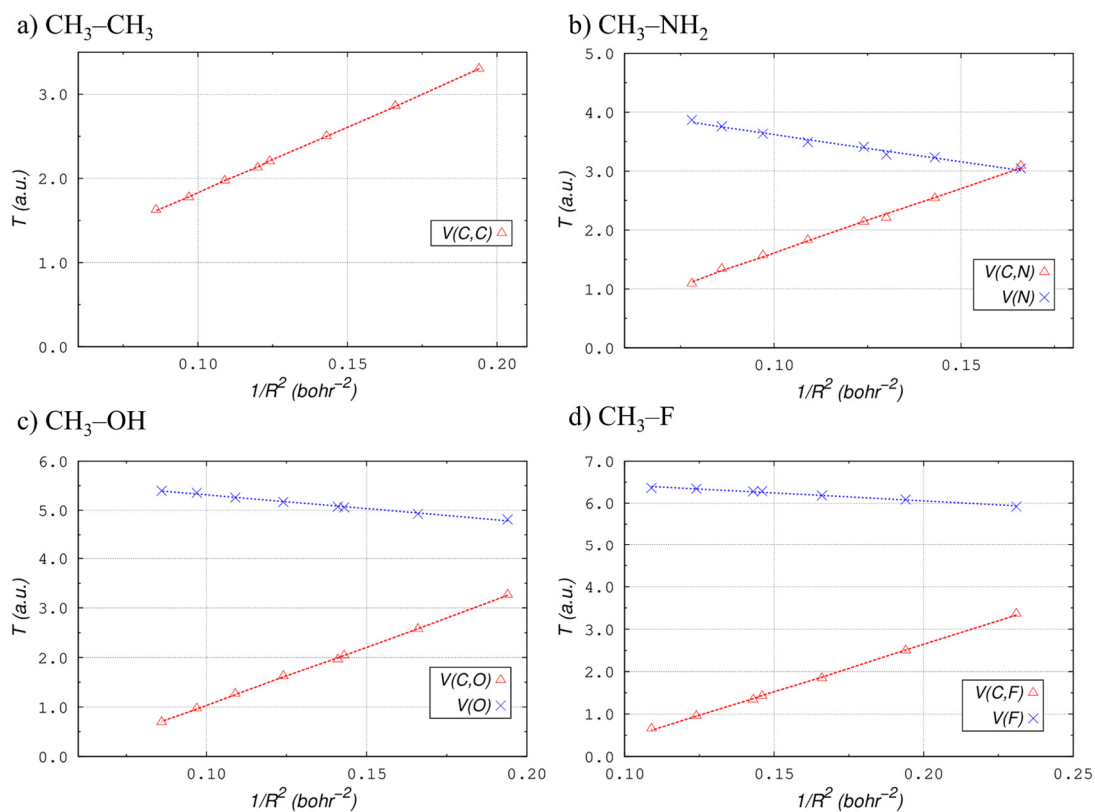

**Figure S6.** ELF-IQA computed bond kinetic energy against  $1/R^2$  for  $V(C,X)$  and  $V(X)$  basins for a) CH<sub>3</sub>-CH<sub>3</sub>, b) CH<sub>3</sub>-NH<sub>2</sub>, c) CH<sub>3</sub>-OH, and d) CH<sub>3</sub>-F.

The linear regression fittings for CH<sub>3</sub>-X set of molecules are the following:

CH<sub>3</sub>-CH<sub>3</sub>:

$$V(C,C): \quad y = 15.635 \cdot x + 0.264; \quad R^2 = 1.000$$

CH<sub>3</sub>-NH<sub>2</sub>:

$$V(C,N): \quad y = 21.946 \cdot x - 0.5854; \quad R^2 = 0.997$$

$$V(N): \quad y = -9.295 \cdot x + 4.551; \quad R^2 = 0.984$$

CH<sub>3</sub>-OH:

$$V(C,O): \quad y = 23.582 \cdot x - 1.329; \quad R^2 = 1.000$$

$$V(O): \quad y = -5.629 \cdot x + 5.877; \quad R^2 = 0.992$$

$\text{CH}_3\text{-F}$ :

$$V(\text{C},\text{F}): \quad y = 22.259 \cdot x - 1.819; \quad R^2 = 0.999$$

$$V(\text{F}): \quad y = -3.754 \cdot x + 6.808; \quad R^2 = 0.982$$

### Exchange-correlation

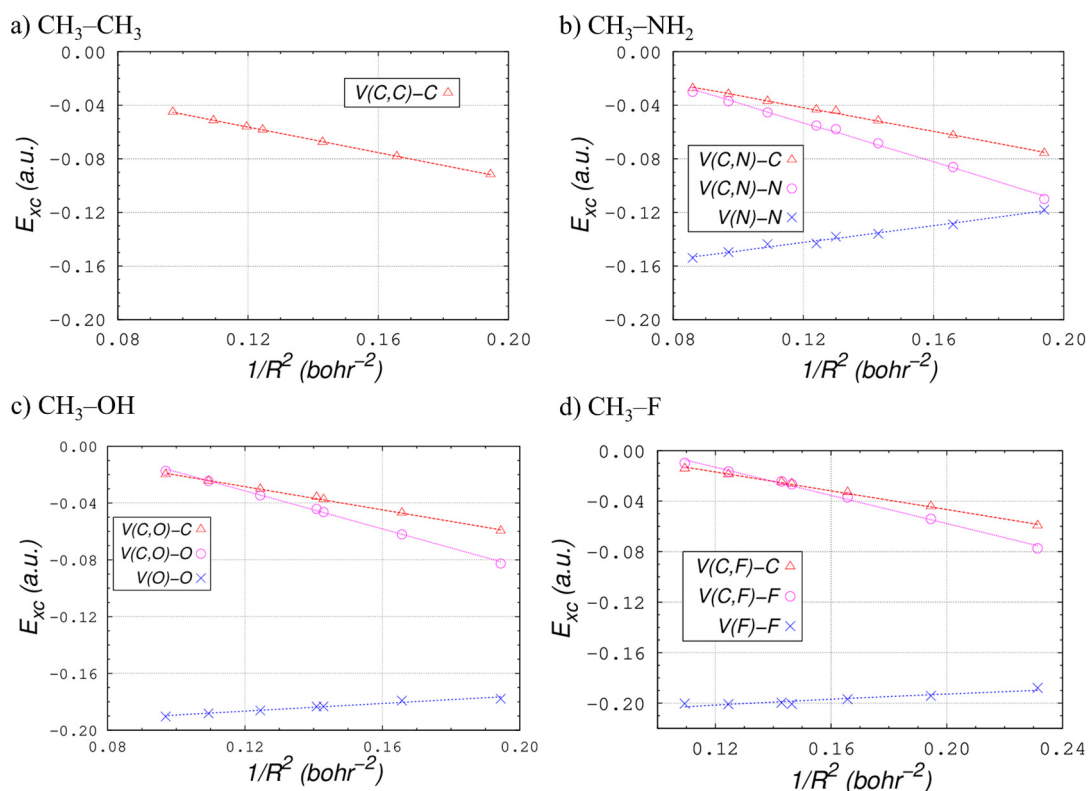

**Figure S7.** ELF-IQA computed exchange-correlation interaction energy between  $V(\text{C},\text{X})$  and  $V(\text{X})$  basins and C and X atoms against  $1/R$  for a)  $\text{CH}_3\text{-CH}_3$ , b)  $\text{CH}_3\text{-NH}_2$ , c)  $\text{CH}_3\text{-OH}$ , and d)  $\text{CH}_3\text{-F}$ .

The linear regression fittings for  $\text{CH}_3\text{-X}$  set of molecules are the following:

$\text{CH}_3\text{-CH}_3$ :

$$V(\text{C},\text{C})\text{-C}: \quad y = -0.360 \cdot x + 0.068; \quad R^2 = 0.998$$

$\text{CH}_3\text{-NH}_2$ :

$$V(\text{C},\text{N})\text{-C}: \quad y = -0.329 \cdot x + 0.072; \quad R^2 = 0.989$$

$$V(\text{C},\text{N})\text{-N}: \quad y = -0.538 \cdot x + 0.132; \quad R^2 = 0.986$$



$$V(N)-N: \quad y = 0.233 \cdot x - 0.223; R^2 = 0.980$$

*CH<sub>3</sub>-OH:*

$$V(C,O)-C: \quad y = -0.305 \cdot x + 0.077; R^2 = 0.989$$

$$V(C,O)-O: \quad y = -0.502 \cdot x + 0.142; R^2 = 0.991$$

$$V(O)-O: \quad y = 0.102 \cdot x - 0.222; R^2 = 0.980$$

*CH<sub>3</sub>-F:*

$$V(C,F)-C: \quad y = -0.301 \cdot x + 0.088; R^2 = 0.988$$

$$V(C,F)-F: \quad y = -0.452 \cdot x + 0.144; R^2 = 0.983$$

$$V(F)-F: \quad y = 0.087 \cdot x - 0.232; R^2 = 0.935$$

### Core Energies

**Table S8.** Total (kinetic, electrostatic and exchange-correlation) energies (in a.u.) for C and N cores in CH<sub>3</sub>-NH<sub>2</sub>.

| R (Å) | Core C | Core N |
|-------|--------|--------|
| 1.2   | 37.322 | 51.318 |
| 1.3   | 37.284 | 51.293 |
| 1.4   | 37.265 | 51.288 |
| 1.5   | 37.256 | 51.297 |
| 1.6   | 37.254 | 51.317 |
| 1.7   | 37.256 | 51.334 |
| 1.8   | 37.259 | 51.354 |
| 1.9   | 37.261 | 51.368 |

**BH<sub>3</sub>-NH<sub>3</sub>, BeH<sub>2</sub>-NH<sub>3</sub>, CH<sub>3</sub>-Li and Li<sub>2</sub>****Kinetic and exchange-correlation energy****Table S9.** Kinetic and Exchange-Correlation energy (in a.u.) for BH<sub>3</sub>-NH<sub>3</sub>, BeH<sub>2</sub>-NH<sub>3</sub>, CH<sub>3</sub>-Li and Li<sub>2</sub>.

| R (Å) | 1/R <sup>2</sup><br>(bohr <sup>-2</sup> ) | BH <sub>3</sub> -NH <sub>3</sub>  |                                       |                                      |
|-------|-------------------------------------------|-----------------------------------|---------------------------------------|--------------------------------------|
|       |                                           | <i>T</i> V(B,N)                   | <i>E<sub>x-c</sub></i> V(B,N)-C(B)    | <i>E<sub>x-c</sub></i> V(B,N)-C(N)   |
| 1.40  | 0.143                                     | 3.231                             | -0.038                                | -0.118                               |
| 1.50  | 0.124                                     | 3.007                             | -0.029                                | -0.112                               |
| 1.60  | 0.109                                     | 2.871                             | -0.021                                | -0.109                               |
| 1.70  | 0.097                                     | 2.794                             | -0.016                                | -0.109                               |
| 1.80  | 0.086                                     | 2.752                             | -0.011                                | -0.011                               |
| 1.67  | 0.101                                     | 2.818                             | -0.017                                | -0.109                               |
| R (Å) | 1/R <sup>2</sup><br>(bohr <sup>-2</sup> ) | BeH <sub>2</sub> -NH <sub>3</sub> |                                       |                                      |
|       |                                           | <i>T</i> V(Be,N)                  | <i>E<sub>x-c</sub></i> V(Be,N)-C(Be)  | <i>E<sub>x-c</sub></i> V(Be,N)-C(N)  |
| 1.50  | 0.124                                     | 3.169                             | -0.027                                | -0.125                               |
| 1.60  | 0.109                                     | 3.053                             | -0.021                                | -0.122                               |
| 1.70  | 0.097                                     | 2.987                             | -0.016                                | -0.120                               |
| 1.80  | 0.086                                     | 2.927                             | -0.012                                | -0.118                               |
| 1.90  | 0.078                                     | 2.866                             | -0.009                                | -0.117                               |
| 1.79  | 0.087                                     | 3.010                             | -0.017                                | -0.122                               |
| R (Å) | 1/R <sup>2</sup><br>(bohr <sup>-2</sup> ) | CH <sub>3</sub> -Li               |                                       |                                      |
|       |                                           | <i>T</i> V(C,Li)                  | <i>E<sub>x-c</sub></i> V(C,Li)-C(C)   | <i>E<sub>x-c</sub></i> V(C,Li)-C(Li) |
| 1.70  | 0.097                                     | 1.997                             | -0.086                                | -0.043                               |
| 1.80  | 0.086                                     | 1.853                             | -0.081                                | -0.037                               |
| 1.90  | 0.078                                     | 1.726                             | -0.077                                | -0.031                               |
| 2.00  | 0.070                                     | 1.616                             | -0.072                                | -0.027                               |
| 2.10  | 0.063                                     | 1.508                             | -0.067                                | -0.023                               |
| 2.20  | 0.058                                     | 1.415                             | -0.063                                | -0.019                               |
| 2.30  | 0.053                                     | 1.330                             | -0.060                                | -0.016                               |
| 1.98  | 0.071                                     | 1.632                             | -0.073                                | -0.028                               |
| R (Å) | 1/R <sup>2</sup><br>(bohr <sup>-2</sup> ) | Li <sub>2</sub>                   |                                       |                                      |
|       |                                           | <i>T</i> V(Li,Li)                 | <i>E<sub>x-c</sub></i> V(Li,Li)-C(Li) |                                      |
| 2.40  | 0.0486                                    | 0.000698                          | -0.0000790                            |                                      |
| 2.50  | 0.0448                                    | 0.000636                          | -0.0000730                            |                                      |
| 2.60  | 0.0414                                    | 0.000583                          | -0.0000680                            |                                      |
| 2.70  | 0.0384                                    | 0.000515                          | -0.0000610                            |                                      |
| 2.80  | 0.0357                                    | 0.000424                          | -0.0000510                            |                                      |
| 2.90  | 0.0333                                    | 0.000413                          | -0.0000510                            |                                      |
| 3.00  | 0.0311                                    | 0.000395                          | -0.0000490                            |                                      |
| 3.10  | 0.0291                                    | 0.000318                          | -0.0000410                            |                                      |
| 2.72  | 0.0378                                    | 0.000509                          | -0.0000600                            |                                      |

The linear regression fittings are the following:

*BH<sub>3</sub>-NH<sub>3</sub>*:

$$TV(B,N): y = 8.596 \cdot x + 1.966; R^2 = 0.966$$

$$E_{x-c} V(B,N)-C(B): y = -0.483 \cdot x + 0.031; R^2 = 0.999$$

$$E_{x-c} V(B,N)-C(N): y = -0.189 \cdot x - 0.090; R^2 = 0.919$$

*BeH<sub>2</sub>-NH<sub>3</sub>*:

$$TV(Be,N): y = 6.286 \cdot x + 2.378; R^2 = 0.995$$

$$E_{x-c} V(Be,N)-C(Be): y = -0.380 \cdot x - 0.020; R^2 = 0.998$$

$$E_{x-c} V(Be,N)-C(N): y = -0.177 \cdot x - 0.103; R^2 = 0.985$$

*CH<sub>3</sub>-Li*:

$$TV(C,Li): y = 15.157 \cdot x + 0.542; R^2 = 0.998$$

$$E_{x-c} V(C,Li)-C(C): y = -0.603 \cdot x - 0.029; R^2 = 0.992$$

$$E_{x-c} V(C,Li)-C(Li): y = -0.606 \cdot x + 0.016; R^2 = 1.000$$

## Electrostatic interaction energy

**Table S10.** Electrostatic energy, *intra* and *inter-basin* (in a.u.) for BH<sub>3</sub>-NH<sub>3</sub>, BeH<sub>2</sub>-NH<sub>3</sub>, CH<sub>3</sub>-Li and Li<sub>2</sub>.

| R (Å) | 1/R (bohr <sup>-1</sup> ) | BH <sub>3</sub> -NH <sub>3</sub>   |                                          |                                         |
|-------|---------------------------|------------------------------------|------------------------------------------|-----------------------------------------|
|       |                           | <i>E</i> <sub>intra</sub> V(B,N)   | <i>E</i> <sub>inter</sub> V(B,N)-C(B)    | <i>E</i> <sub>inter</sub> V(B,N)-C(N)   |
| 1.40  | 0.378                     | 1.430                              | -3.417                                   | -8.915                                  |
| 1.50  | 0.353                     | 1.290                              | -3.045                                   | -8.454                                  |
| 1.60  | 0.331                     | 1.195                              | -2.742                                   | -8.157                                  |
| 1.70  | 0.311                     | 1.135                              | -2.493                                   | -7.988                                  |
| 1.80  | 0.294                     | 1.103                              | -2.290                                   | -7.916                                  |
| 1.67  | 0.317                     | 1.153                              | -2.567                                   | -8.039                                  |
| R (Å) | 1/R (bohr <sup>-1</sup> ) | BeH <sub>2</sub> -NH <sub>3</sub>  |                                          |                                         |
|       |                           | <i>E</i> <sub>intra</sub> V(Be,N)  | <i>E</i> <sub>inter</sub> V(Be,N)-C(Be)  | <i>E</i> <sub>inter</sub> V(Be,N)-C(N)  |
| 1.50  | 0.353                     | 1.397                              | -1.918                                   | -9.054                                  |
| 1.60  | 0.331                     | 1.331                              | -1.768                                   | -8.824                                  |
| 1.70  | 0.311                     | 1.287                              | -1.641                                   | -8.676                                  |
| 1.80  | 0.294                     | 1.254                              | -1.529                                   | -8.567                                  |
| 1.90  | 0.279                     | 1.219                              | -1.425                                   | -8.420                                  |
| 1.79  | 0.295                     | 1.293                              | -1.650                                   | -8.704                                  |
| R (Å) | 1/R (bohr <sup>-1</sup> ) | CH <sub>3</sub> -Li                |                                          |                                         |
|       |                           | <i>E</i> <sub>intra</sub> V(C,Li)  | <i>E</i> <sub>inter</sub> V(C,Li)-C(C)   | <i>E</i> <sub>inter</sub> V(C,Li)-C(Li) |
| 1.70  | 0.311                     | 1.046                              | -5.659                                   | -0.911                                  |
| 1.80  | 0.294                     | 0.954                              | -5.361                                   | -0.833                                  |
| 1.90  | 0.279                     | 0.862                              | -5.065                                   | -0.754                                  |
| 2.00  | 0.265                     | 0.786                              | -4.807                                   | -0.689                                  |
| 2.10  | 0.252                     | 0.714                              | -4.544                                   | -0.665                                  |
| 2.20  | 0.241                     | 0.649                              | -4.302                                   | -0.640                                  |
| 2.30  | 0.230                     | 0.588                              | -4.068                                   | -0.614                                  |
| 1.98  | 0.267                     | 0.800                              | -4.852                                   | -0.702                                  |
| R (Å) | 1/R (bohr <sup>-1</sup> ) | Li <sub>2</sub>                    |                                          |                                         |
|       |                           | <i>E</i> <sub>intra</sub> V(Li,Li) | <i>E</i> <sub>inter</sub> V(Li,Li)-C(Li) |                                         |
| 2.40  | 0.220                     | 0.000003                           | -0.000878                                |                                         |
| 2.50  | 0.212                     | 0.000003                           | -0.000867                                |                                         |
| 2.60  | 0.204                     | 0.000003                           | -0.000853                                |                                         |
| 2.70  | 0.196                     | 0.000002                           | -0.000819                                |                                         |
| 2.80  | 0.189                     | 0.000002                           | -0.000780                                |                                         |
| 2.90  | 0.182                     | 0.000002                           | -0.000760                                |                                         |
| 3.00  | 0.176                     | 0.000002                           | -0.000735                                |                                         |
| 3.10  | 0.171                     | 0.000002                           | -0.000692                                |                                         |
| 2.72  | 0.194                     | 0.000002                           | -0.000815                                |                                         |

The linear regression fittings are the following:

*BH<sub>3</sub>-NH<sub>3</sub>*:

$$E_{\text{Inter}} V(\text{B},\text{N}): \quad y = 3.961 \cdot x - 0.092; R^2 = 0.977$$

$$E_{\text{Intra}} V(\text{B},\text{N})-\text{C}(\text{B}): \quad y = -13.479 \cdot x + 1.698; R^2 = 0.998$$

$$E_{\text{Intra}} V(\text{B},\text{N})-\text{C}(\text{N}): \quad y = -12.130 \cdot x - 4.234; R^2 = 0.950$$

*BeH<sub>2</sub>-NH<sub>3</sub>*:

$$E_{\text{Inter}} V(\text{Be},\text{N}): \quad y = 2.343 \cdot x + 0.563; R^2 = 0.991$$

$$E_{\text{Intra}} V(\text{Be},\text{N})-\text{C}(\text{Be}): \quad y = -6.603 \cdot x + 0.414; R^2 = 0.998$$

$$E_{\text{Intra}} V(\text{Be},\text{N})-\text{C}(\text{N}): \quad y = -8.269 \cdot x - 6.116; R^2 = 0.992$$

*CH<sub>3</sub>-Li*:

$$E_{\text{Inter}} V(\text{C},\text{Li}): \quad y = 15.157 \cdot x + 0.542; R^2 = 0.998$$

$$E_{\text{Intra}} V(\text{C},\text{Li})-\text{C}(\text{C}): \quad y = -0.603 \cdot x - 0.029; R^2 = 0.992$$

$$E_{\text{Intra}} V(\text{C},\text{Li})-\text{C}(\text{Li}): \quad y = -0.606 \cdot x + 0.016; R^2 = 1.000$$
